# Supplementary material
Source: Springer Nature journal article supplement (https://www.springermedizin.de/resource/supplementary/12943_2007_361_MOESM10_ESM.pdf/9554012)

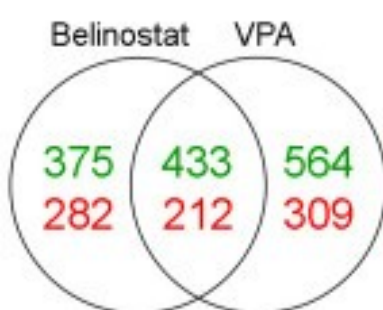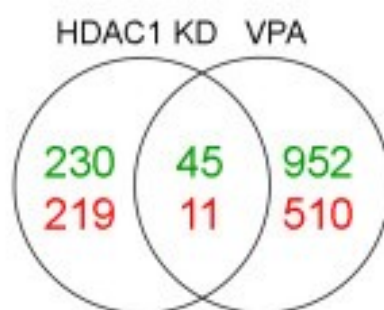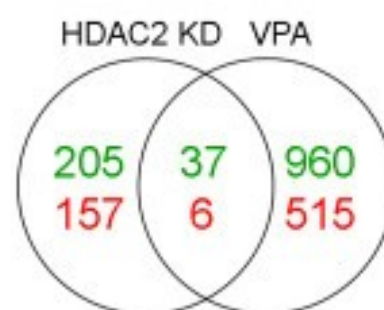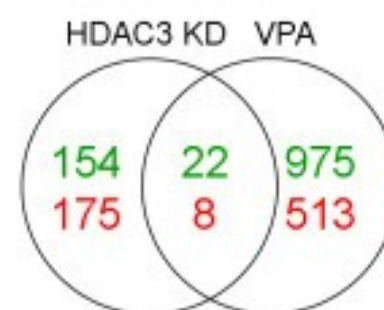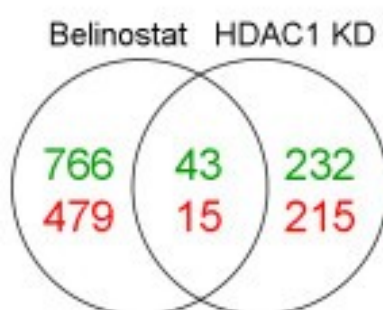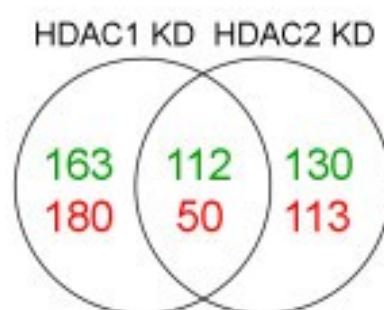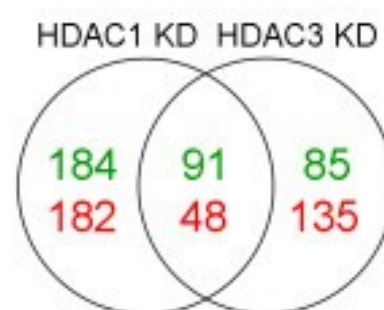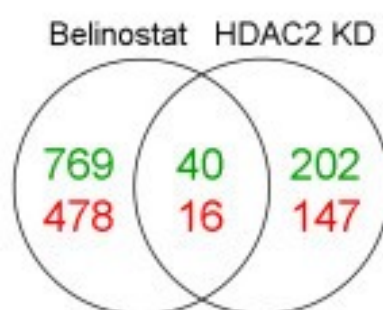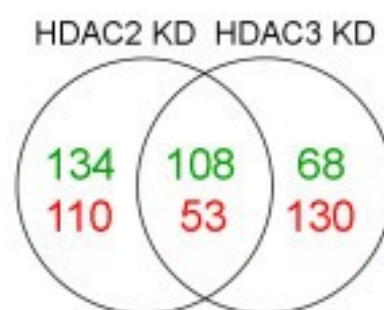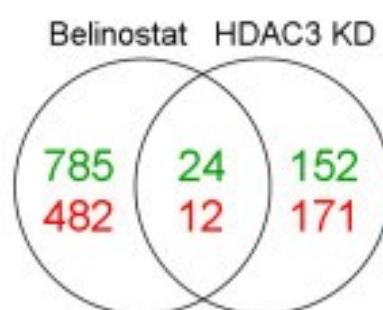

Supplement: MOESM10 [file 9554012]
